# Supplementary material for: Efficacy and safety of infliximab or adalimumab in severe mucocutaneous Behçet's syndrome refractory to traditional immunosuppressants: a 6-month, multicentre, randomised controlled, prospective, parallel group, single-blind trial
Source: HighWire-hosted journal article supplement (doi:10.1136/ard-2024-226113), 2024-10-17
Supplement: ard-2024-226113supp001_data_supplement.pdf [file ard-2024-226113supp001_data_supplement.pdf]

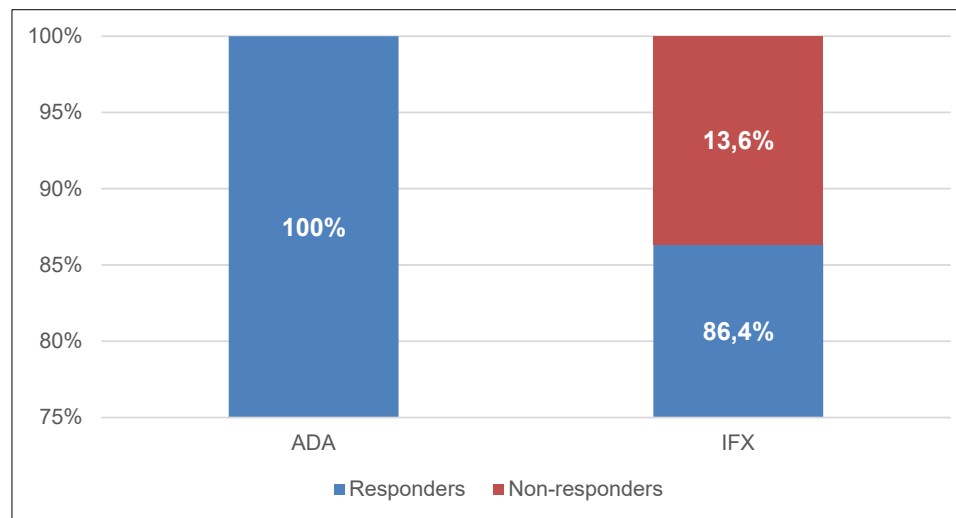

**Supplementary Figure 1.** Sub-analysis in muco-cutaneous involvement patients. Percentage of responders in ADA e IFX arms
